# Supplementary material
Source: PubMed Central journal article supplement (PMC8760704)
Supplement: mmc1.pdf [file mmc1.pdf]

## Supplemental methods

### B cell panel

| Fluorochrome | Target | Clone   | Dilution |
|--------------|--------|---------|----------|
| BV421        | CD3    | SK7     | 1:100    |
| PerCyP-Cy5.5 | CD19   | HIB198  | 1:100    |
| APC-H7       | CD20   | 2H7     | 1:100    |
| PE           | CD24   | ML5     | 1:50     |
| Pe-Cy7       | CD27   | M-T271  | 1:100    |
| APC          | CD38   | HIT2    | 1:100    |
| FITC         | IgM    | G20-127 | 1:100    |
| BV510        | IgD    | IA6-2   | 1:100    |

### T/NK cell panel

|              |        |         |       |
|--------------|--------|---------|-------|
| BV421        | CD3    | SK7     | 1:100 |
| PerCyP-Cy5.5 | CD4    | RTA-T4  | 1:100 |
| APC-H7       | CD8    | SK1     | 1:100 |
| APC          | CD56   | B159    | 1:50  |
| Pe-Cy7       | CD45RA | HI100   | 1:100 |
| PE           | CD62L  | DREG-56 | 1:100 |
| FITC         | CD45RO | UCHL1   | 1:100 |
| APC-R700     | CD28   | CD28.2  | 1:100 |
| BV510        | CD31   | WM59    | 1:100 |

### Treg panel

|              |                         |         |       |
|--------------|-------------------------|---------|-------|
| AF488 (FITC) | CD3                     | SK7     | 1:100 |
| PerCyP-Cy5.5 | Dump<br>(CD14/CD19/CD8) |         | 1:100 |
| AF647 (APC)  | LAG3                    | 11C3C65 | 1:100 |
| AF700        | CD4                     | SK3     | 1:100 |
| APC-Cy7      | CD45RA                  | HI100   | 1:100 |
| PE           | CD127                   | A019D5  | 1:100 |
| PE-Texas Red | CD62L                   | DREG-56 | 1:100 |
| PE-Cy7       | CD39                    | A1      | 1:100 |
| BV421        | CD25                    | BC96    | 1:100 |
| BV510        | Live/dead               |         | 1:100 |
| BV605        | CCR7                    | G043H7  | 1:100 |

### HSPC panel

|             |        |       |       |
|-------------|--------|-------|-------|
| FITC        | CD45RA | HI100 | 1:100 |
| PE          | CD90   | PR13  | 1:10  |
| APC-Cy7     | CD123  | 6H6   | 1:100 |
| APC         | CD34   | 561   | 1:100 |
| PE-Cy7      | CD38   | HIT2  | 1:100 |
| BV510       | CD10   | HI10a | 1:100 |
| Pac Blue    | CD117  | 104D2 | 1:100 |
| PerCP-Cy5.5 | CD19   | HIB19 | 1:100 |

# Supplemental Figure 1

## Neutrophil Recovery unrelated donors

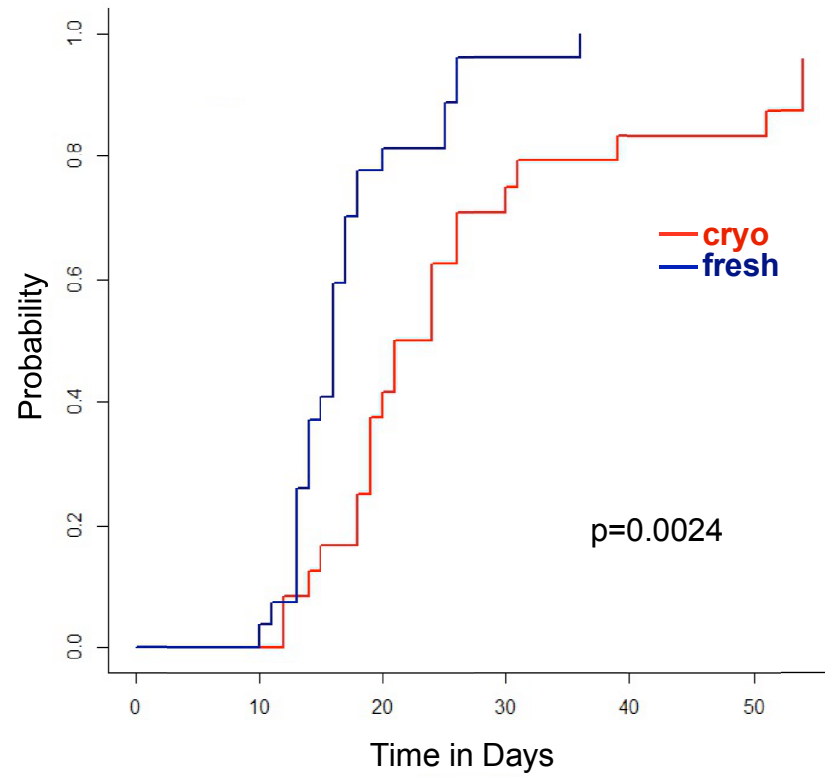

## Platelet Recovery unrelated donors

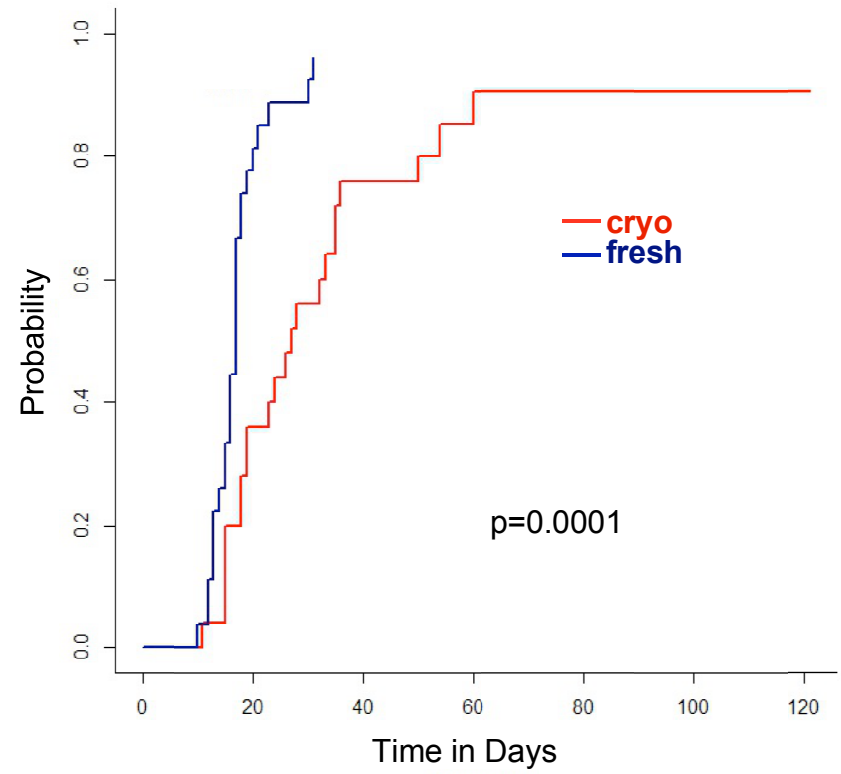

# Supplemental Figure 2

A

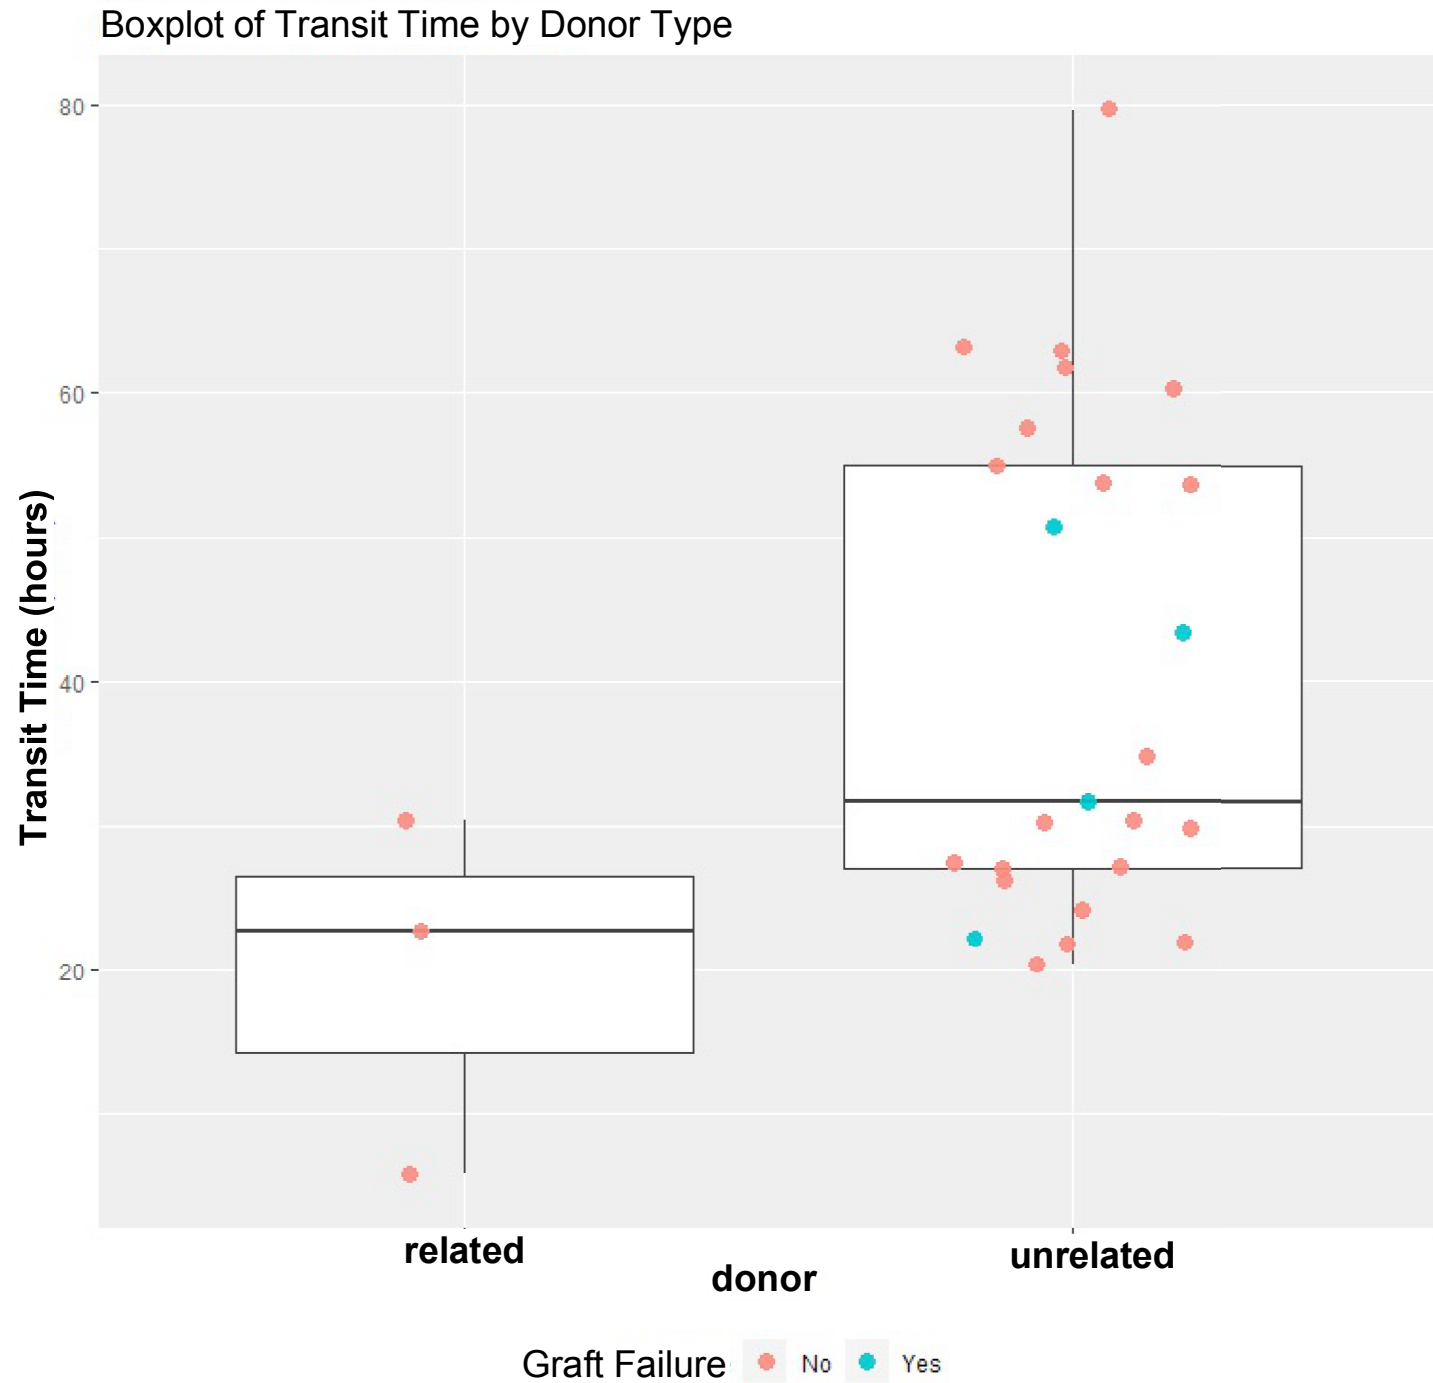

# Supplemental Figure 2

B

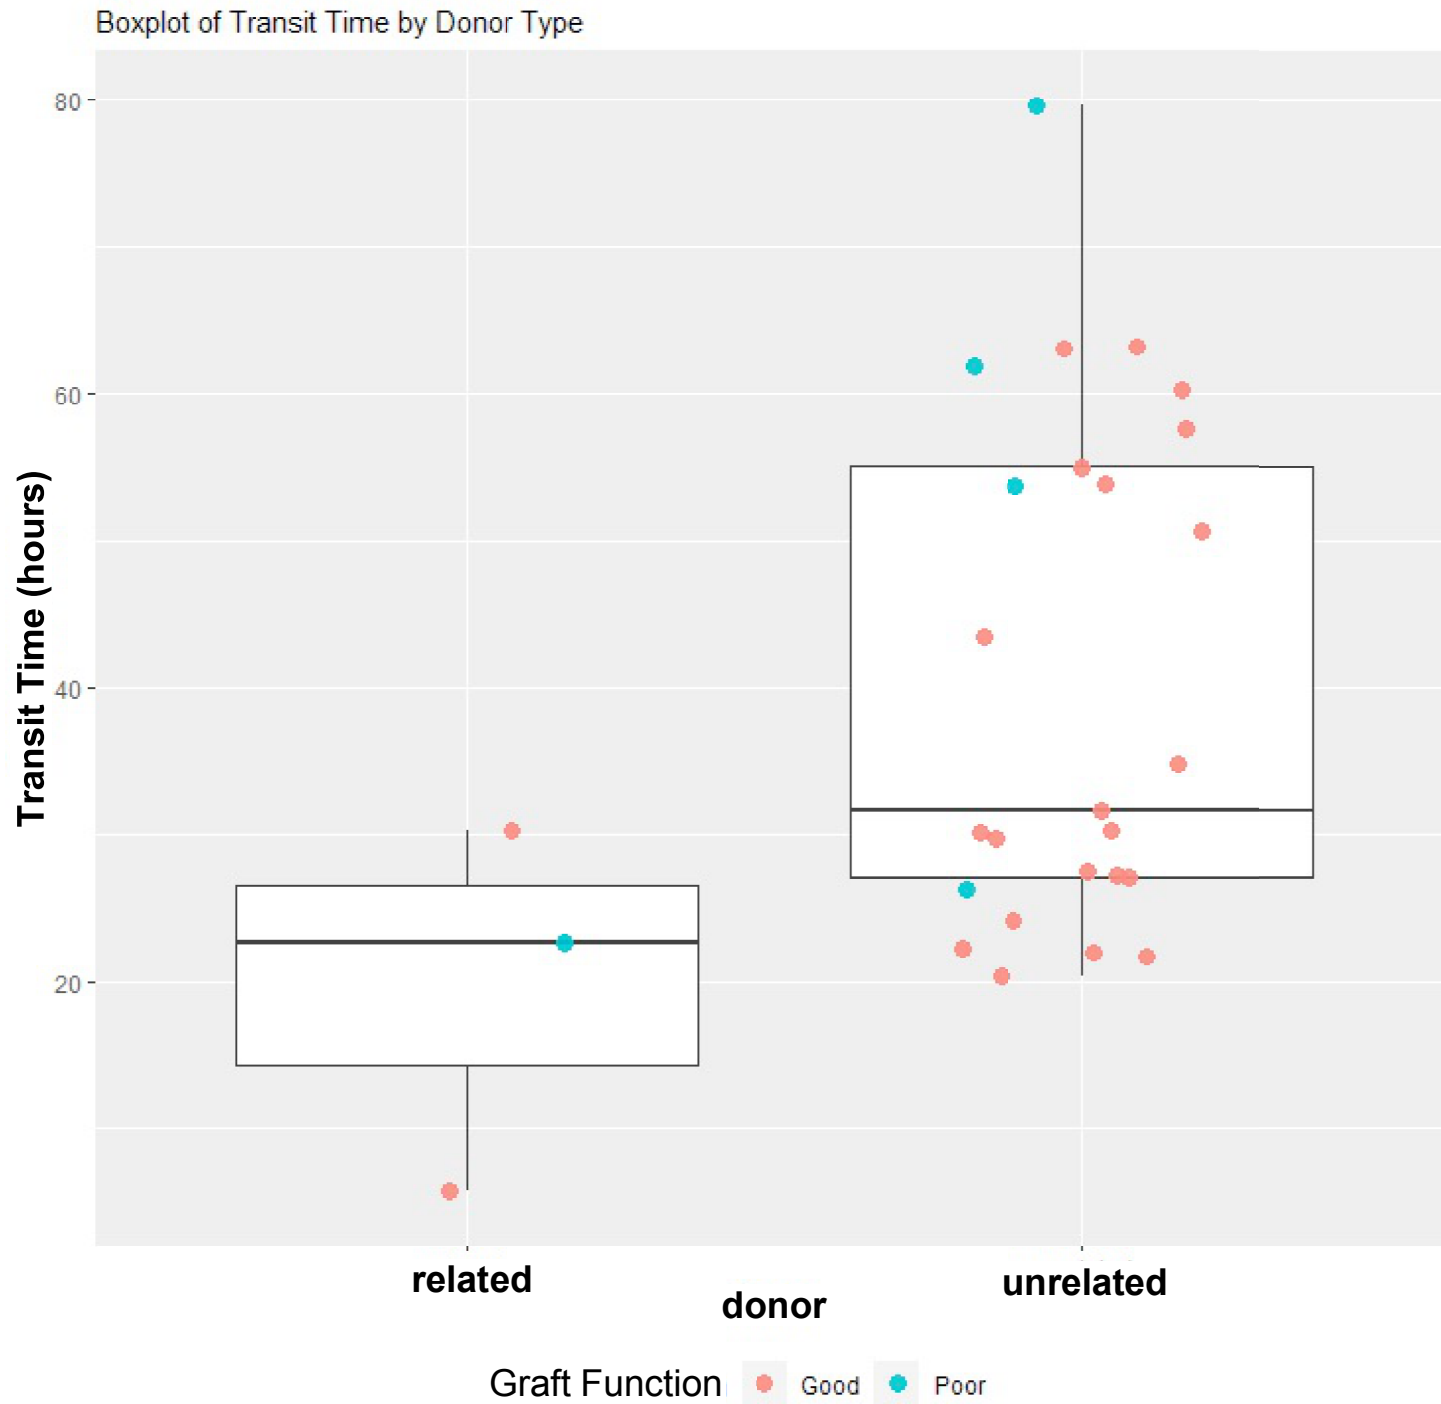

Supplemental Figure 3

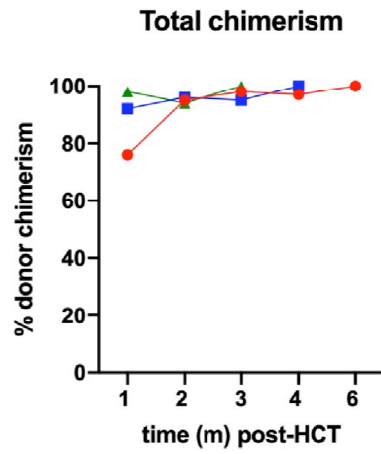

● cryo 31  
■ cryo 33  
▲ cryo 34

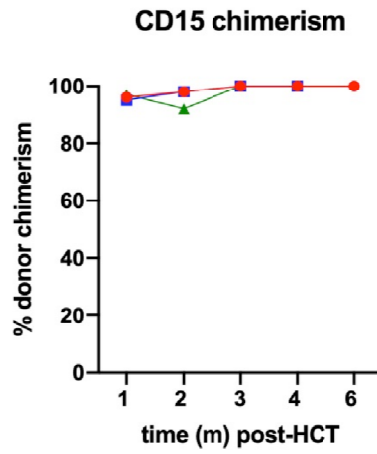

● cryo 31  
■ cryo 33  
▲ cryo 34

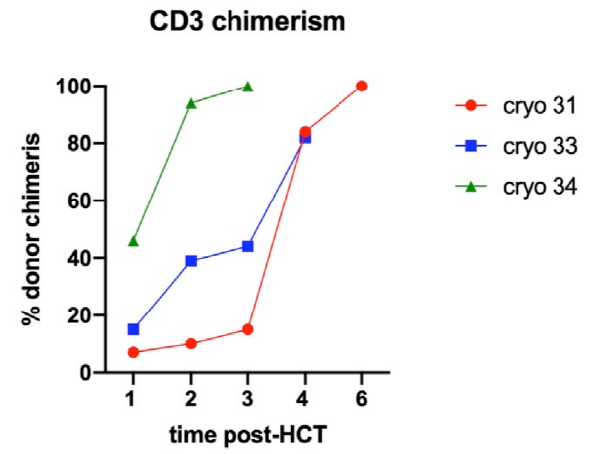

● cryo 31  
■ cryo 33  
▲ cryo 34

# Supplemental Figure 4

A

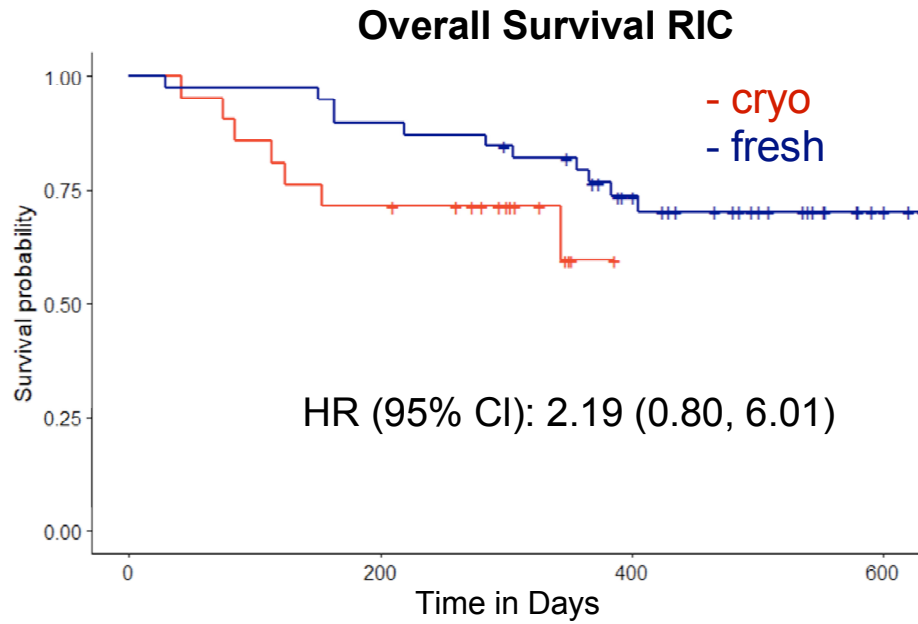

B

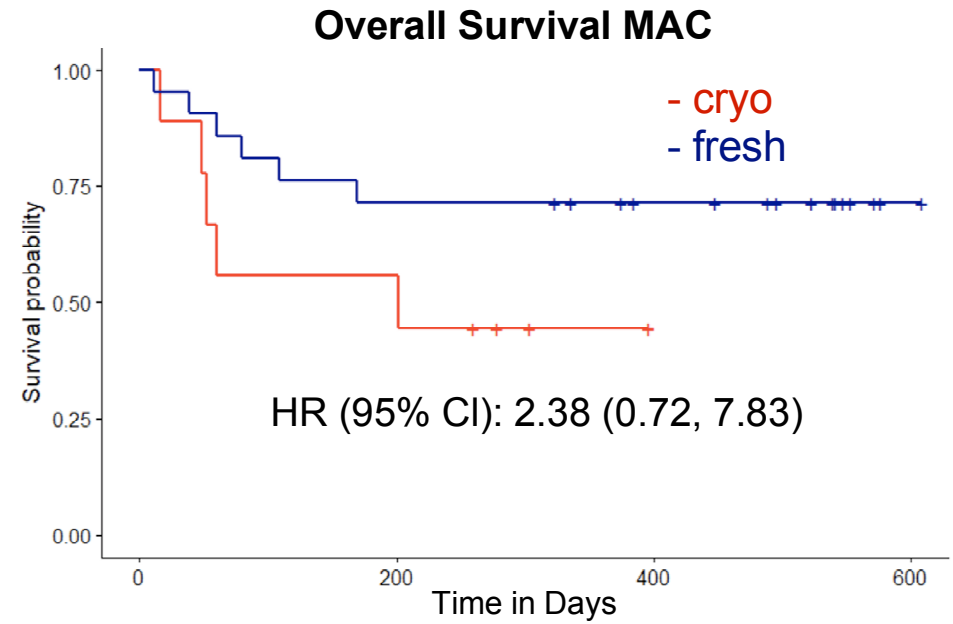

C

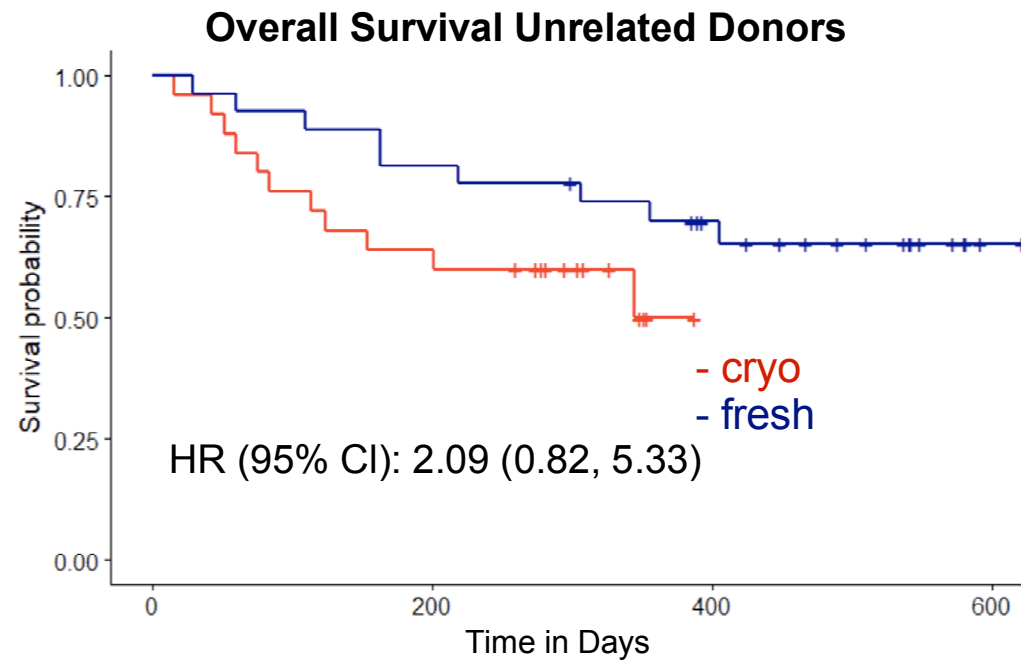

# Supplemental Figure 5

A

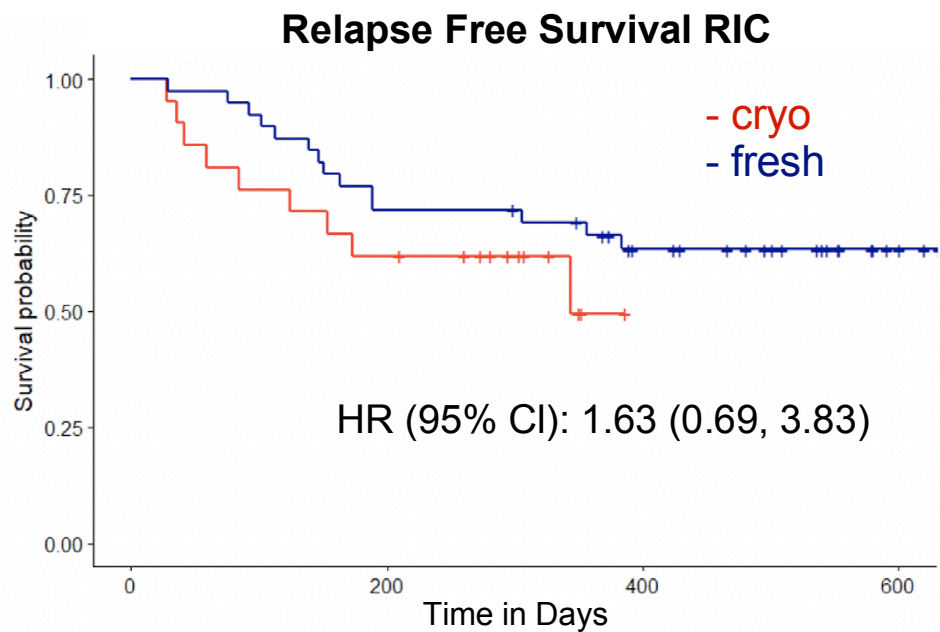

B

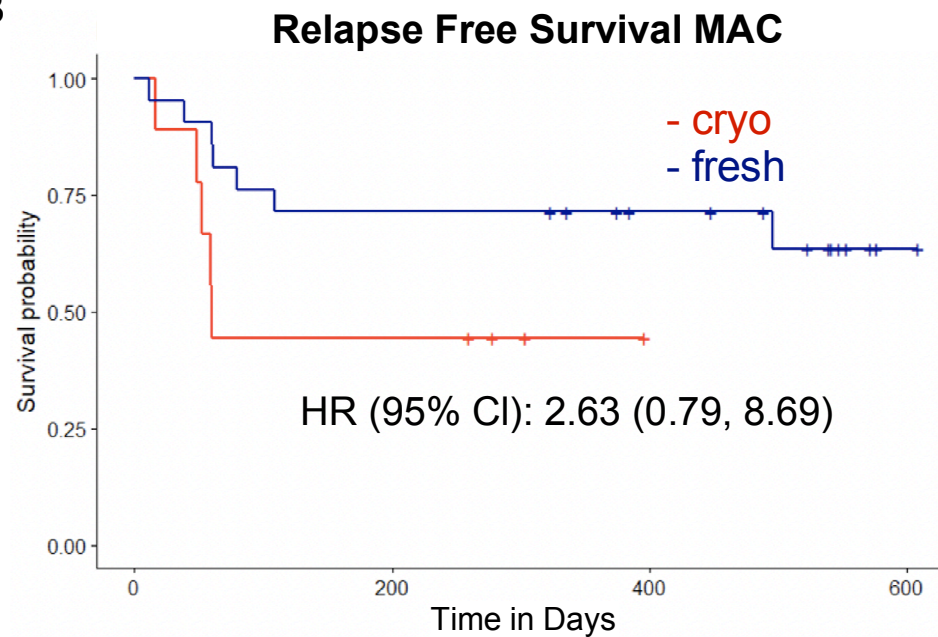

# Supplemental Figure 6

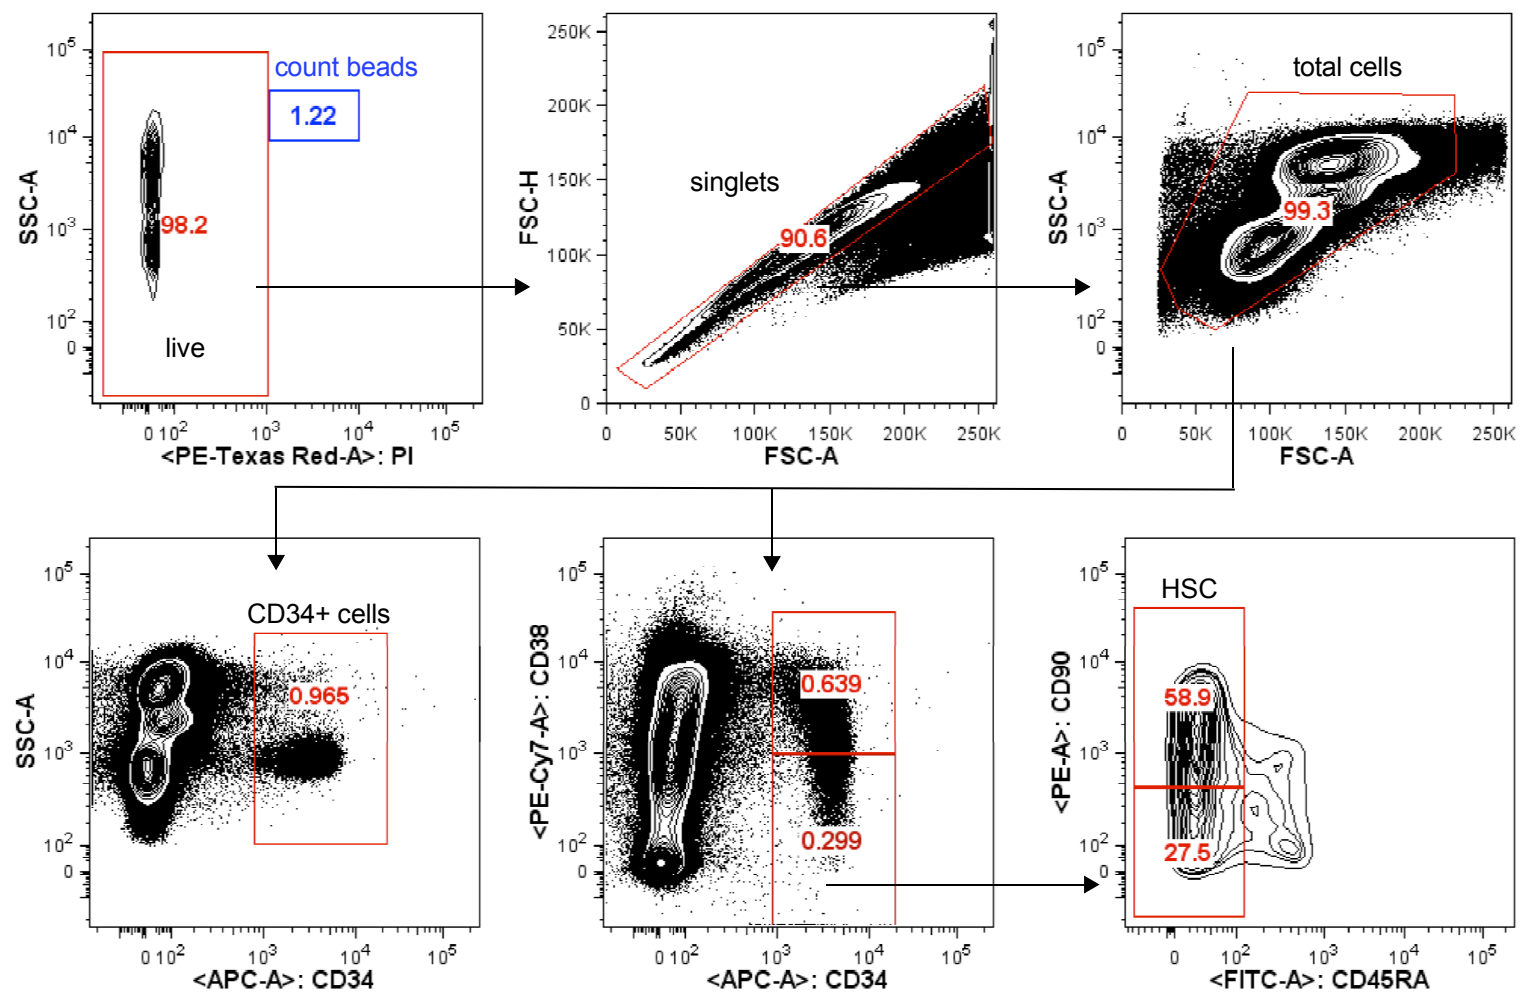



Supplemental Figure 7

A

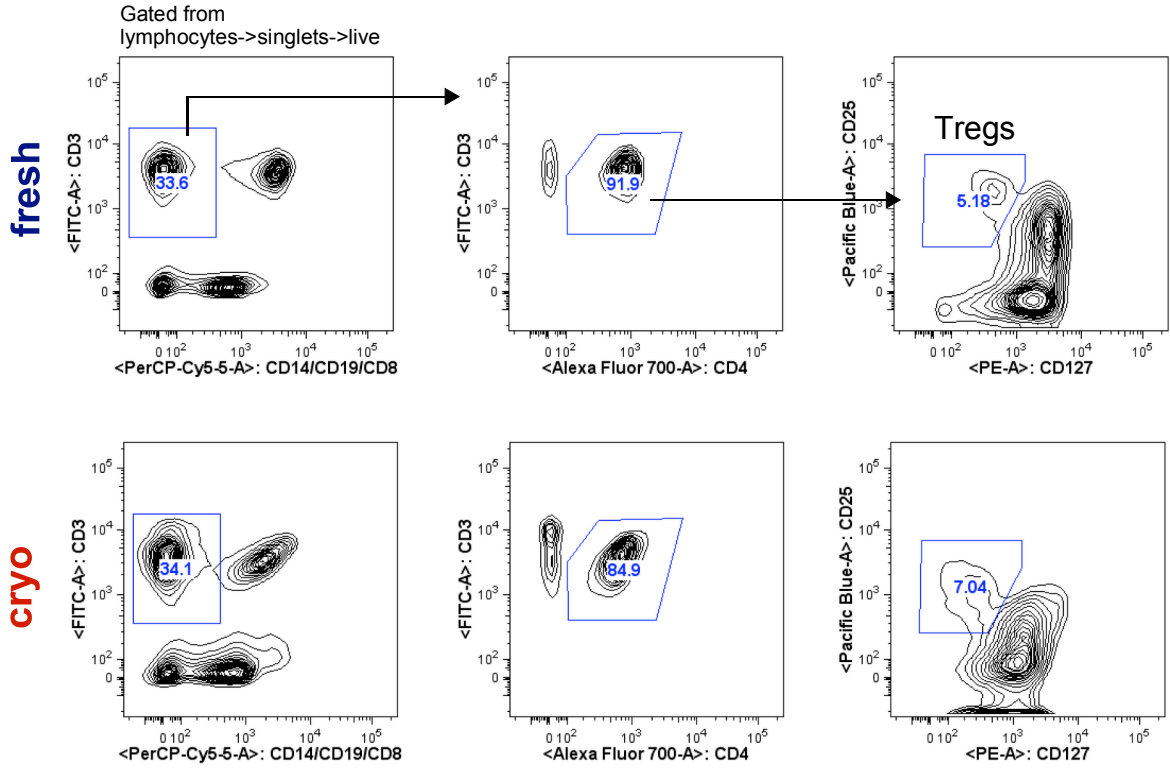

B

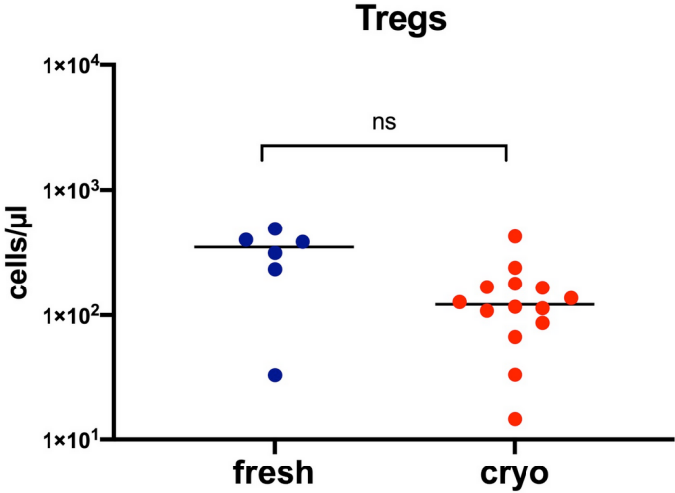

## **Supplemental Figures**

**Supplemental Figure 1.** Hematopoietic recovery in recipients of cryopreserved versus fresh URD grafts. (A) Neutrophil recovery (B) Platelet recovery.

**Supplemental Figure 2.** Transit time for cryopreserved grafts. (A) Boxplot of transit time by donor type indicating patients with GF (blue dots) and patients without GF (orange dots). (B) Boxplot of transit time by donor type indicating patients with poor graft function (blue dots) and patients without poor graft function (orange dots).

**Supplemental Figure 3.** Dynamic of total, myeloid (CD15) and T cell (CD3) donor chimerism at different timepoints post-HCT (1, 2, 3, 4 and 6 months) for 3 patients, who underwent cryopreserved RIC allo-HCT.

**Supplemental Figure 4.** Kaplan Meier curves in cryopreserved versus fresh allo-HCT recipients. (A) OS in RIC patients. (B) OS in MAC patients. (C) OS in patients with URD grafts.

**Supplemental Figure 5.** Kaplan Meier curves in cryopreserved versus fresh allo-HCT recipients. (A) RFS in RIC patients. (B) RFS in MAC patients.

**Supplemental Figure 6.** Representative FACS plots in one apheresis sample from allogeneic donor demonstrating gating strategy to identify viable (live) cells, CD34<sup>+</sup> cells and HSC (CD34<sup>+</sup>CD38<sup>-</sup>CD90<sup>+</sup>CD45RA<sup>-</sup>).

**Supplemental Figure 7.** (A) Representative flow cytometry plots in one fresh and one cryopreserved apheresis sample from allogeneic donor demonstrating gating strategy for Tregs (CD3<sup>+</sup>CD4<sup>+</sup>CD25<sup>+</sup>CD127<sup>-</sup>). (B) Absolute counts (cells/ $\mu$ l) of Tregs as assessed by flow cytometry in fresh as compared to cryopreserved apheresis samples.
